# Supplementary material
Source: PubMed Central journal article supplement (PMC5643044)
Supplement: NIHMS870259-supplement-_Supplemental_material_.pdf [file NIHMS870259-supplement-_Supplemental_material_.pdf]

SUPPLEMENTAL MATERIAL

Supplemental Figure 1

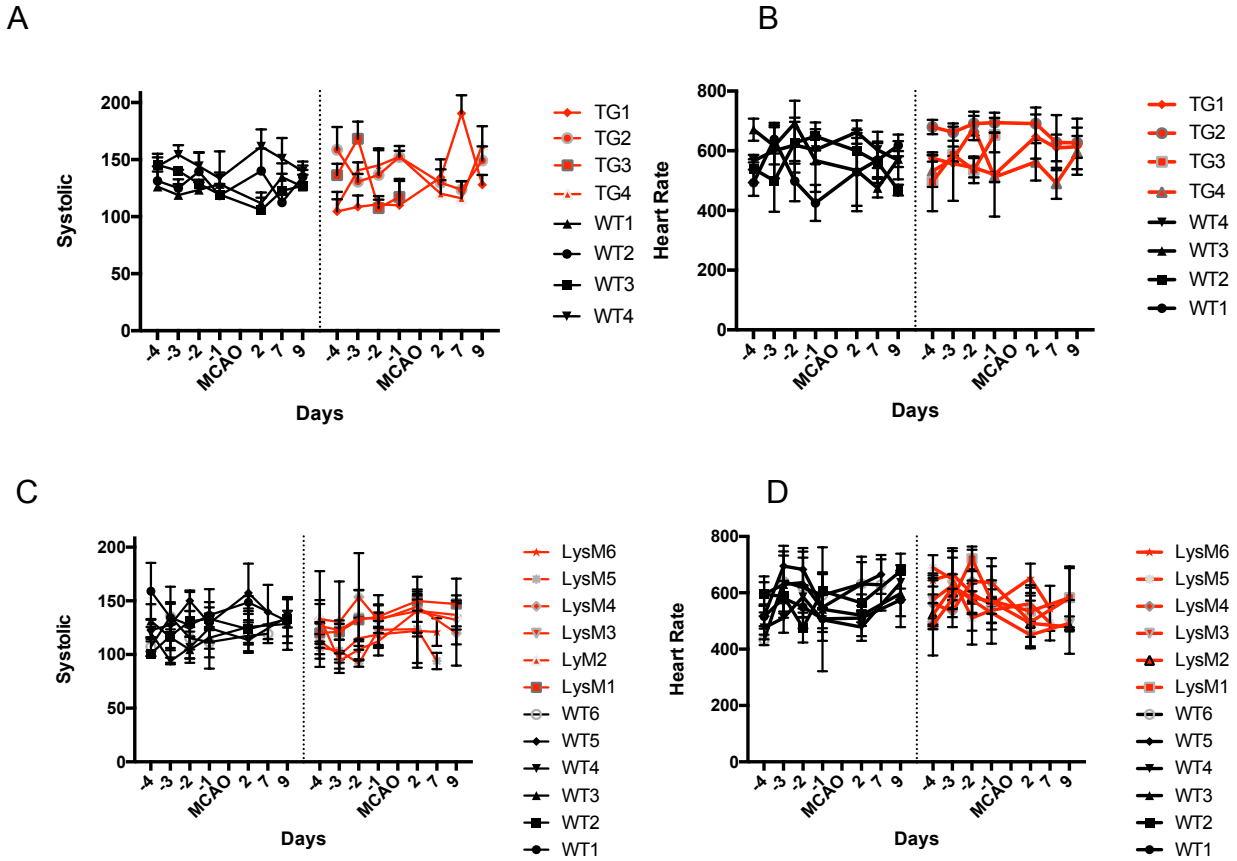

Blood pressure and heart rates measurements for WT, TG, and LysM-Cre CD39 mice. Mice were measured for 4 days before MCAO, and then at 48, 7, and 9 days after MCAO. A) Systolic pressures +/- SD. 4 mice were measured in each group. Mouse TG3 did not survive MCAO procedure, but pre-surgery systolic pressures were recorded. B) Heart rate +/- SD from the same mice as in part A. C) Systolic pressure +/- SD. 6 WT and LysM-Cre CD39 mice were measured in each group. WT5, WT6, LysM5 and LysM6 were recorded up to day 7. D) Heart rates were measured for 6 WT and LysM-Cre CD39 mice. Data shown +/- SD. WT5, WT6, LysM5 and LysM6 were recorded up to day 7.

Supplemental Figure 2

A

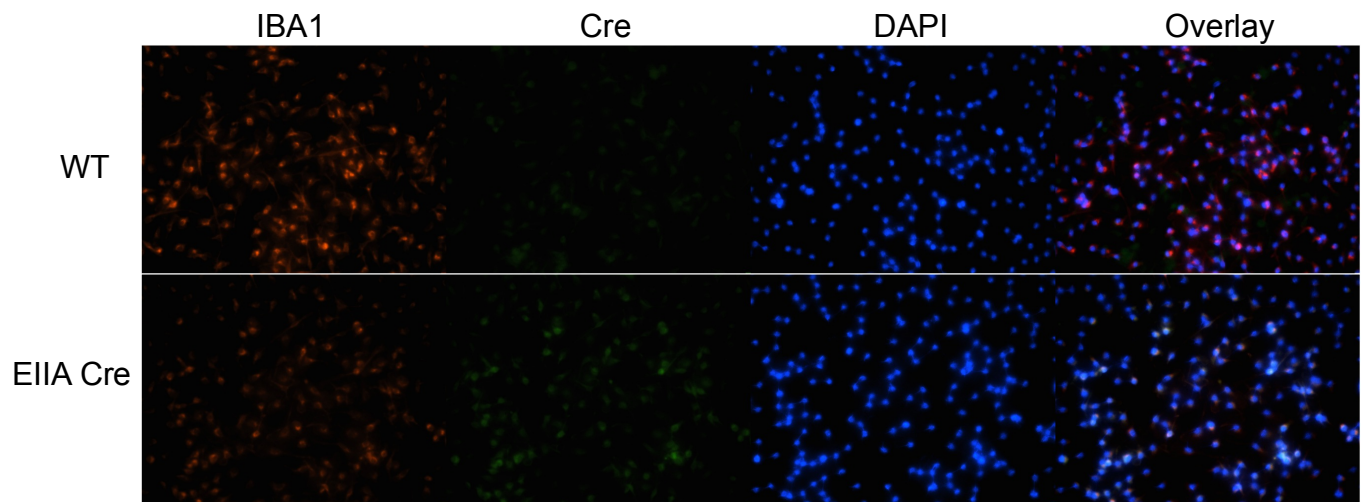

B

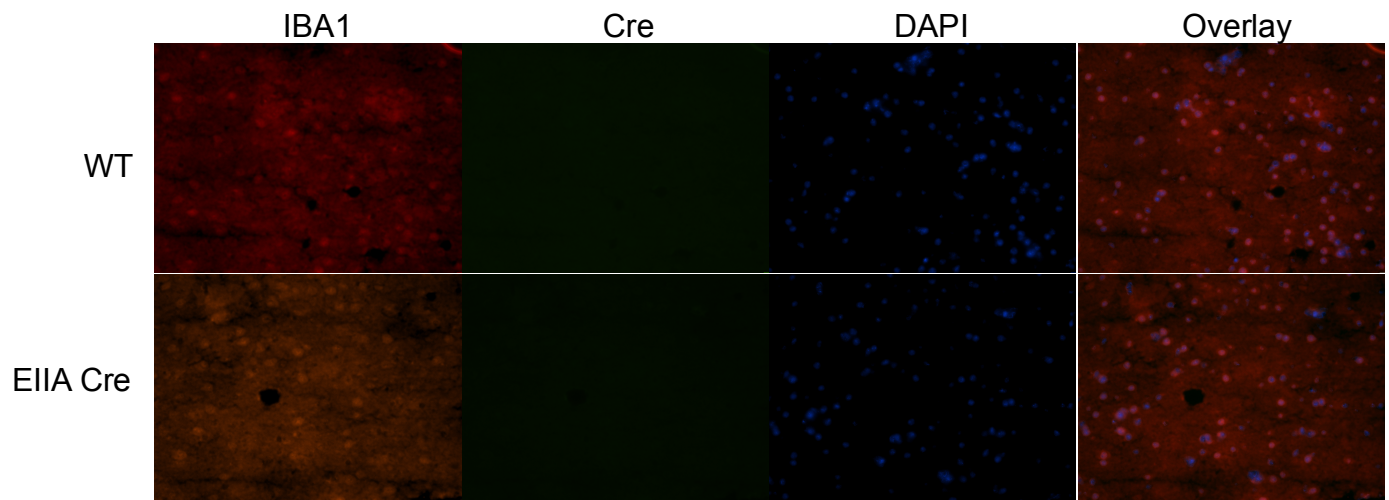

C

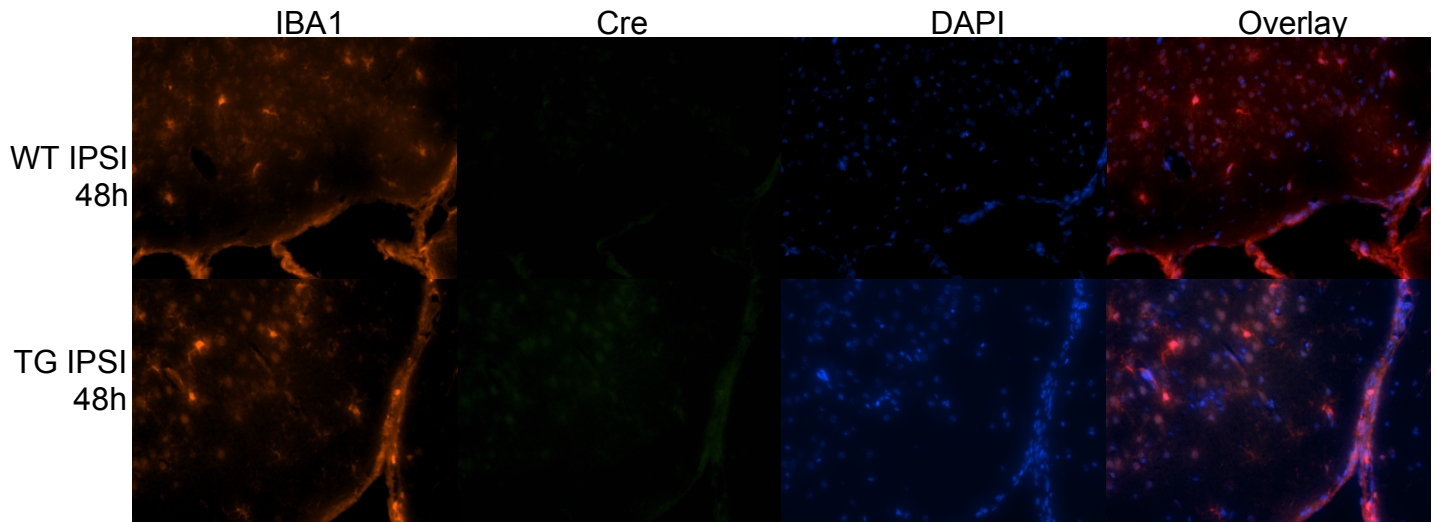

A) Immunofluorescent staining of bone marrow derived macrophages from wild type and EIIA-Cre mice for IBA1 and Cre recombinase. Bone marrow derived macrophages from EIIA-Cre mice have detectable Cre expression which overlaps with IBA1 expression. B) Naïve wild type and EIIA-Cre brain sections stained for IBA1 and Cre recombinase. While IBA1 microglial staining is present in both wild type and EIIA-Cre mouse brains, Cre recombinase could not be detected in these cells, indicating that Cre recombinase activity is lacking in microglia. C) 48 hours after MCAO, wild type and global transgenic mouse brains were stained for IBA1 and Cre recombinase. Both transgenic and wild type mice have microglial staining in mice but no Cre expression was detected in WT mice as expected. TG mice had detectable Cre staining after MCAO whereas naïve EIIA-Cre mice showed no detectable IBA1<sup>+</sup>Cre<sup>+</sup> staining, indicating that these are infiltrating Cre<sup>+</sup> cells. Tetramethylrhodamine was used to label IBA1 (microglia/macrophages), and fluorescein was used to label Cre recombinase. DAPI was used as a nuclear counterstain.

### Supplemental Figure 3

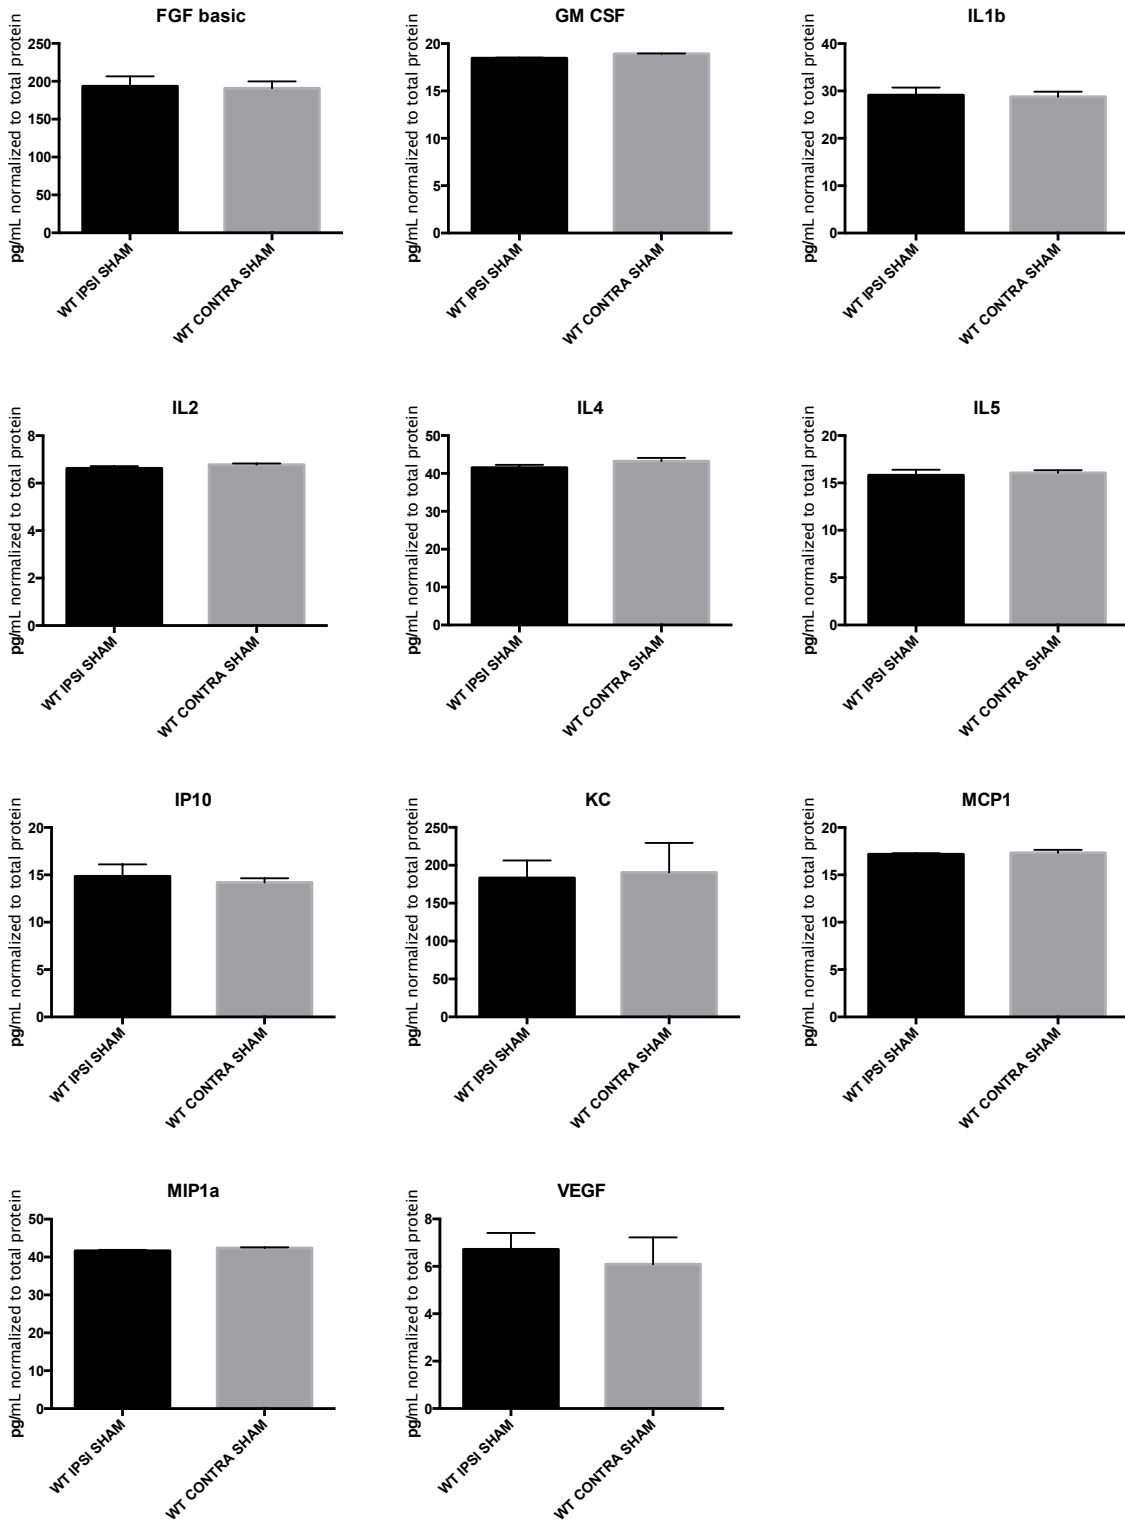

Cytokine panel: Wild type mice were sham operated and then left and right hemispheres, and protein was collected and analyzed by cytokine panel 6 hours after sham surgeries.
